# Supplementary material
Source: PubMed Central journal article supplement (PMC7703250)
Supplement: Supp_Table1.pdf [file Supp_Table1.pdf]

## Supplementary Data

SUPPLEMENTARY TABLE S1. SPEARMAN CORRELATIONS OF ENDOCRINE-DISRUPTING CHEMICALS WITH MATERNAL SOCIODEMOGRAPHIC, ANTHROPOMETRIC, AND PERINATAL CHARACTERISTICS AMONG 199 EARLY-LIFE EXPOSURE IN MEXICO TO ENVIRONMENTAL TOXICANTS MOTHERS

|               | <i>Maternal age</i> | <i>Parity</i> | <i>First trimester BMI</i> | <i>Height</i> | <i>Infant birth weight</i> |
|---------------|---------------------|---------------|----------------------------|---------------|----------------------------|
| BPA           | 0.08                | -0.09         | 0.08                       | -0.09         | -0.16                      |
| MBzP          | 0.06                | -0.01         | 0.10                       | 0.00          | -0.13                      |
| MCPP          | 0.14                | -0.08         | 0.01                       | 0.00          | -0.10                      |
| MEP           | 0.06                | 0.00          | 0.08                       | 0.05          | -0.02                      |
| $\Sigma$ DEHP | 0.12                | 0.02          | 0.12                       | -0.06         | -0.13                      |
| $\Sigma$ DBP  | 0.04                | -0.07         | 0.08                       | 0.04          | -0.11                      |

BMI, body mass index; BPA, bisphenol A; DBP, dibutyl phthalate metabolites; DEHP, di-2-ethylhexyl phthalate metabolites; MBzP, monobenzyl phthalate; MCPP, mono-3-carboxypropyl phthalate; MEP, monoethyl phthalate.
