# Supplementary material
Source: PubMed Central journal article supplement (PMC7703250)
Supplement: Supp_Table2.pdf [file Supp_Table2.pdf]

## Supplementary Data

SUPPLEMENTARY TABLE S2. ASSOCIATIONS OF A 1-INTERQUARTILE RANGE INCREMENT IN URINARY CONCENTRATIONS OF THE GEOMETRIC MEAN (ACROSS ALL THREE TRIMESTERS) FOR EACH NATURAL LOG-TRANSFORMED ENDOCRINE DISRUPTING CHEMICAL WITH WEIGHT CHANGE FROM DELIVERY TO 1 YEAR POSTPARTUM

| <i>Average weight retention (kg) by 1 year postpartum per IQR of each EDC</i> |                         |                         |                         |                         |                      |
|-------------------------------------------------------------------------------|-------------------------|-------------------------|-------------------------|-------------------------|----------------------|
| <i>IQR<sup>a</sup></i>                                                        | <i>Model 0</i><br>n=194 | <i>Model 1</i><br>n=163 | <i>Model 2</i><br>n=163 | <i>Model 3</i><br>n=163 |                      |
| BPA                                                                           | 0.92                    | 0.37 (−0.49 to 1.22)    | 0.60 (−0.31 to 1.51)    | 0.61 (−0.31 to 1.52)    | 0.49 (−0.43 to 1.42) |
| MBzP                                                                          | 1.21                    | 0.81 (−0.02 to 1.64)    | 0.51 (−0.43 to 1.44)    | 0.49 (−0.45 to 1.43)    | 0.38 (−0.57 to 1.33) |
| MCPP                                                                          | 1.08                    | 0.66 (−0.30 to 1.61)    | 0.39 (−0.67 to 1.44)    | 0.40 (−0.66 to 1.46)    | 0.37 (−0.68 to 1.42) |
| MEP                                                                           | 1.67                    | 0.28 (−0.62 to 1.17)    | 0.39 (−0.59 to 1.37)    | 0.36 (−0.63 to 1.35)    | 0.31 (−0.67 to 1.30) |
| ΣDEHP                                                                         | 0.90                    | 0.85 (−0.05 to 1.75)    | 0.98 (−0.01 to 1.98)    | 0.96 (−0.03 to 1.96)    | 0.86 (−0.15 to 1.86) |
| ΣDBP                                                                          | 1.34                    | 0.65 (−0.26 to 1.57)    | 0.34 (−0.68 to 1.36)    | 0.34 (−0.68 to 1.36)    | 0.27 (−0.75 to 1.29) |

Model 0: Adjusted for geometric mean of urinary specific gravity across all three trimesters of pregnancy. Model 1: Model 0 + maternal age at enrollment, parity, first trimester BMI, height, gestational age at the first trimester visit, and time elapsed between delivery and the 1 year postpartum visit. Model 2: Model 2 + smoking habits during pregnancy (never, former, and smoked during pregnancy), and breastfeeding duration (<6 months and ≥6 months). Model 3: Model 2 + offspring birth weight (g).

<sup>a</sup>Natural log transformed due to non-normal distributions.

EDC, endocrine-disrupting chemical; IQR, interquartile range.
